# Supplementary material
Source: PubMed Central journal article supplement (PMC4687463)
Supplement: labinvest201594x1.pdf [file labinvest201594x1.pdf]

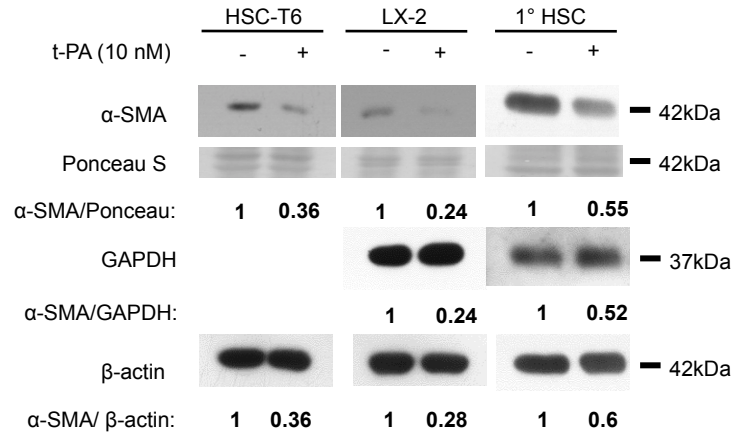

**Supplementary Figure S1. Comparison of different loading controls for western blot analyses.** The representative western blot analyses of pooled samples, as depicted in Fig. 1A, are shown with their corresponding Ponceau S staining, western blot analyses for GAPDH (when possible), and re-probing for  $\beta$ -actin. After initially probing for  $\alpha$ -SMA, blots were stripped and probed for GAPDH and then stripped and assessed for  $\beta$ -actin levels. Densitometry analyses shown below each set of panels represents the  $\alpha$ -SMA values normalized for each loading control, relative to treatment with vehicle.

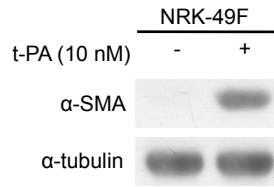

**Supplementary Figure S2. Differential effect of exogenous t-PA on kidney fibroblasts.** NRK-49F cells were treated with t-PA as described in Materials and Methods. Whole cell lysates were subjected to western blot analysis for  $\alpha$ -SMA as a marker of fibroblast activation. The protein loading control  $\alpha$ -tubulin is shown.

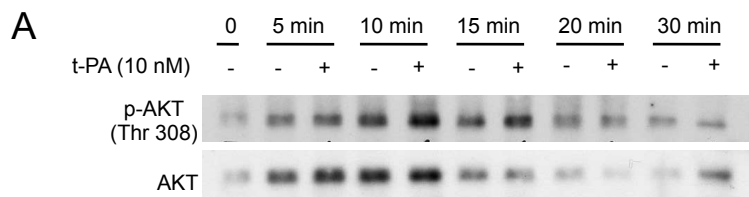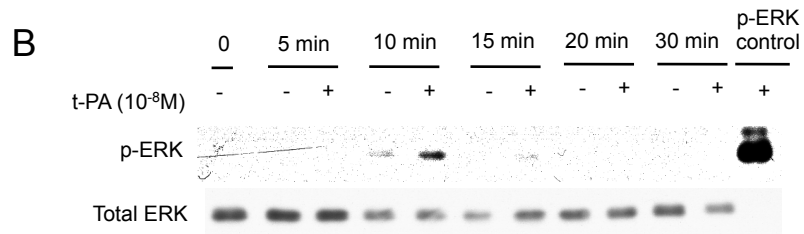

**Supplementary Figure S3. Induction of downstream signaling pathways after exogenous t-PA treatment of HSC-T6 cells.** HSC-T6 cells were serum starved and treated with t-PA or vehicle control as described in Materials and Methods for varying lengths of time. Whole cell lysates were analyzed by western blot for phospho-AKT and total AKT (A), or phospho-ERK and total ERK (B).

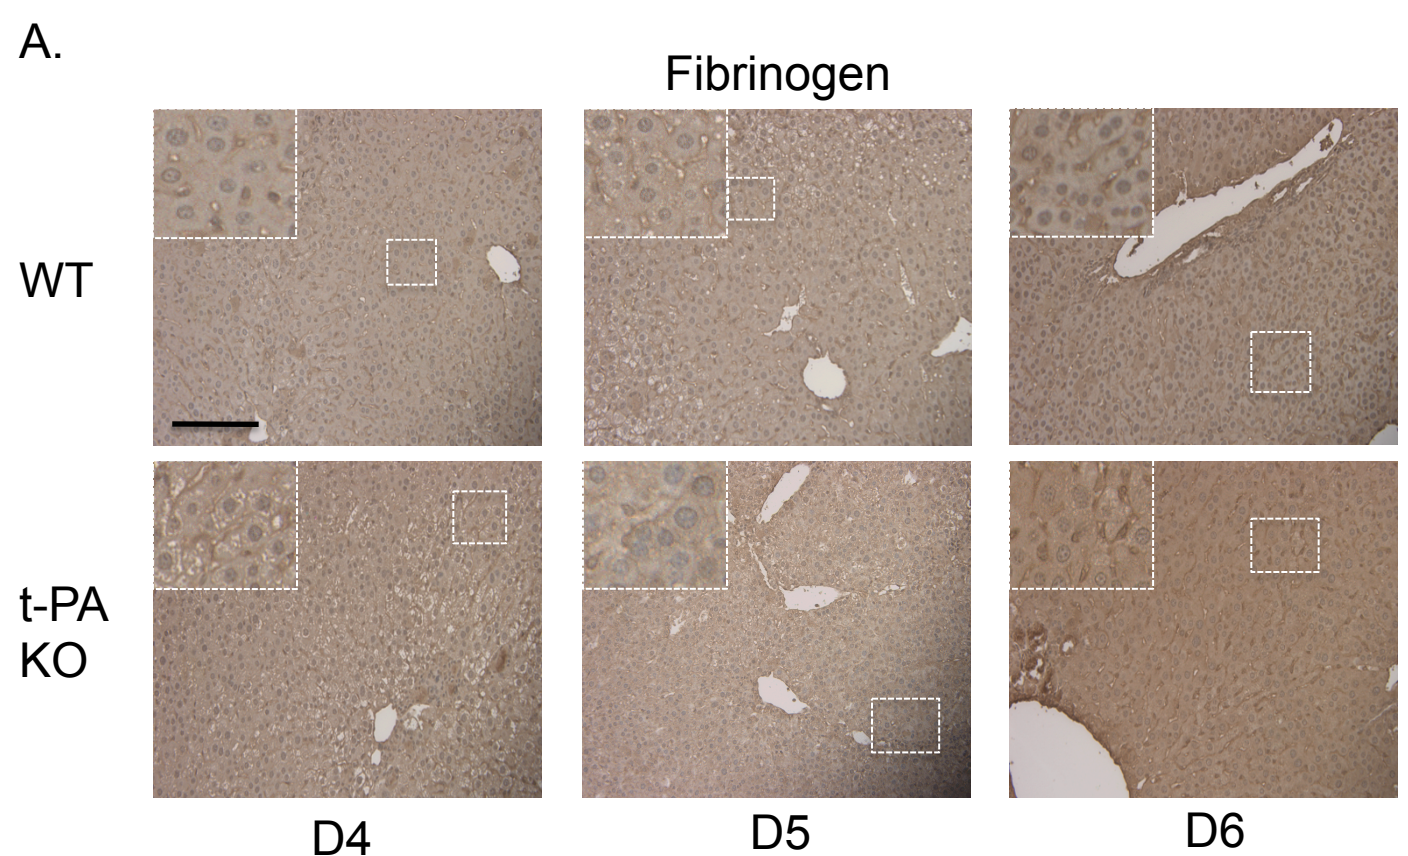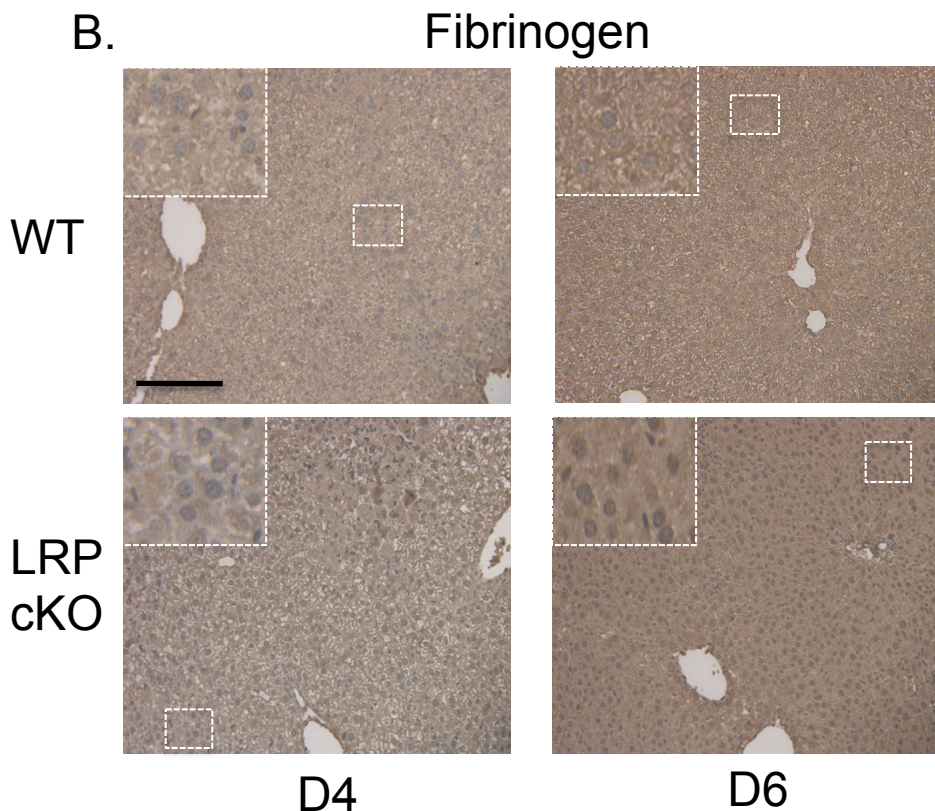

**Supplementary Fig. S4. Analysis of fibrin/fibrinogen staining in t-PA and LRP cKOs after acute hepatic injury.** **A.** C57Bl/6 (WT) and t-PA null mice (t-PA KO) and **B.** LRP<sup>flox/flox</sup> (WT) and LRP<sup>flox/flox</sup>;SM22-Cre<sup>+</sup> (LRP1 cKO) were treated with CCL<sub>4</sub> as described in Materials and Methods. Representative images of immunohistochemistry with anti-fibrin/fibrinogen antibodies at, **A.** days 4, 5 and 6 post injury and **B.** days 4 and 6 post injury. No real differences in fibrinogen staining were detectable in either the t-PA KO or LRP cKO at all time points. Scale bars, 50  $\mu$ m.
